# Supplementary material
Source: PubMed Central journal article supplement (PMC5115481)
Supplement: ADVS-3-0c-s001.pdf [file ADVS-3-0c-s001.pdf]

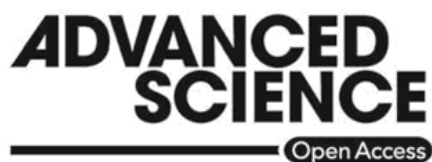

## Supporting Information

for *Adv. Sci.*, DOI: 10.1002/advs.201600097

**Boosting Power Density of Microbial Fuel Cells with 3D  
Nitrogen-Doped Graphene Aerogel Electrode**

*Yang Yang, Tianyu Liu, Xun Zhu,\* Feng Zhang, Dingding Ye,  
Qiang Liao, and Yat Li\**

## Supporting Information

**Boosting Power Density of Microbial Fuel Cells with Three-dimensional Nitrogen-doped Graphene Aerogel Electrode**

Yang Yang<sup>†a,b</sup>, Tianyu Liu<sup>†b</sup>, Xun Zhu<sup>a\*</sup>, Feng Zhang<sup>c</sup>, Dingding Ye<sup>a</sup>, Qiang Liao<sup>a</sup>, Yat Li<sup>b\*</sup>

<sup>a</sup> Key Laboratory of Low-Grade Energy Utilization Technologies and Systems, Institute of Engineering Thermophysics, Chongqing University, Chongqing, China, 400030

<sup>b</sup> Department of Chemistry and Biochemistry, University of California – Santa Cruz, Santa Cruz, California, United States, 95064

<sup>c</sup> Key Laboratory for Advanced Technology in Environmental Protection of Jiangsu Province, Yancheng Institute of Technology, Yancheng, China, 224051

† These authors contributed equally to this work.

**Supplementary Figures and Tables****Table S1.** Element Contents of GA and N-GA

| Sample | C Atomic % | O Atomic % | N Atomic % |
|--------|------------|------------|------------|
| GA     | 81.51      | 18.49      | -          |
| N-GA   | 81.61      | 16.14      | 2.24       |

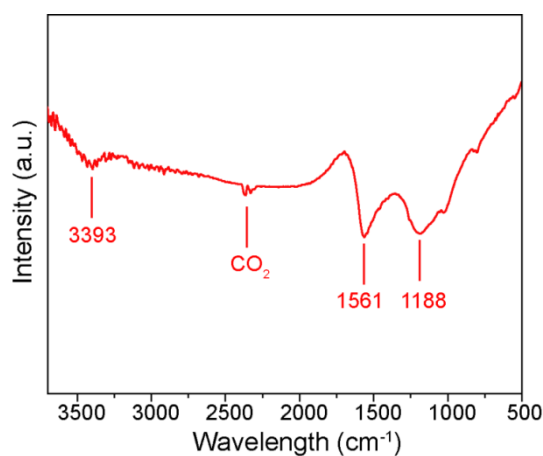

**Figure S1.** The FT-IR spectrum of N-GA. The characteristic peaks of the amine groups are labeled. The doublet at *ca.* 2300  $\text{cm}^{-1}$  comes from carbon dioxide in the atmosphere.

As shown in Figure S1, the peak at 3393  $\text{cm}^{-1}$ , 1561  $\text{cm}^{-1}$  and 1188  $\text{cm}^{-1}$  can be ascribed to

N-H stretching of amine groups, red-shifted in-plane vibration of C=C as a result of binding with amine groups, and C-N stretching, respectively.<sup>[1]</sup>

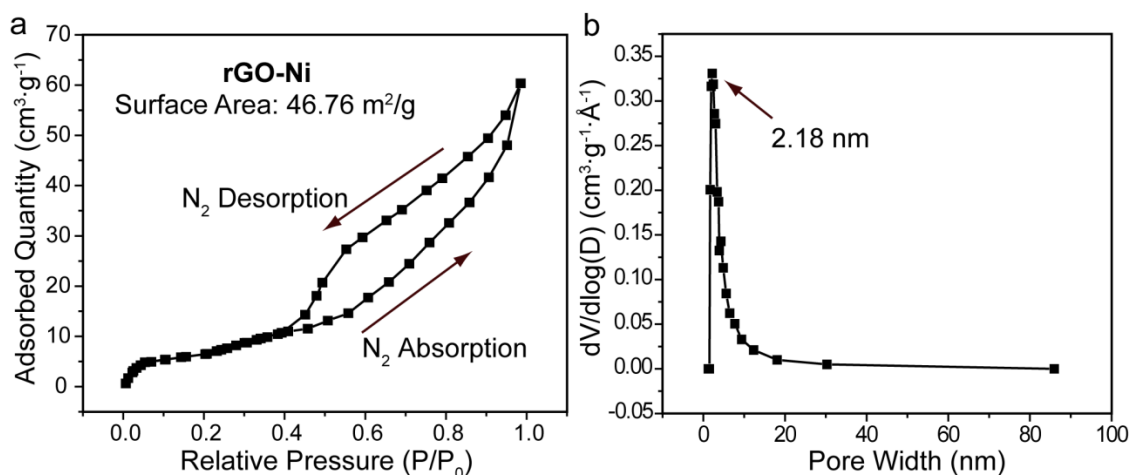

**Figure S2.** (a) Nitrogen adsorption/desorption isotherm and (b) pore size distribution of rGO-Ni.

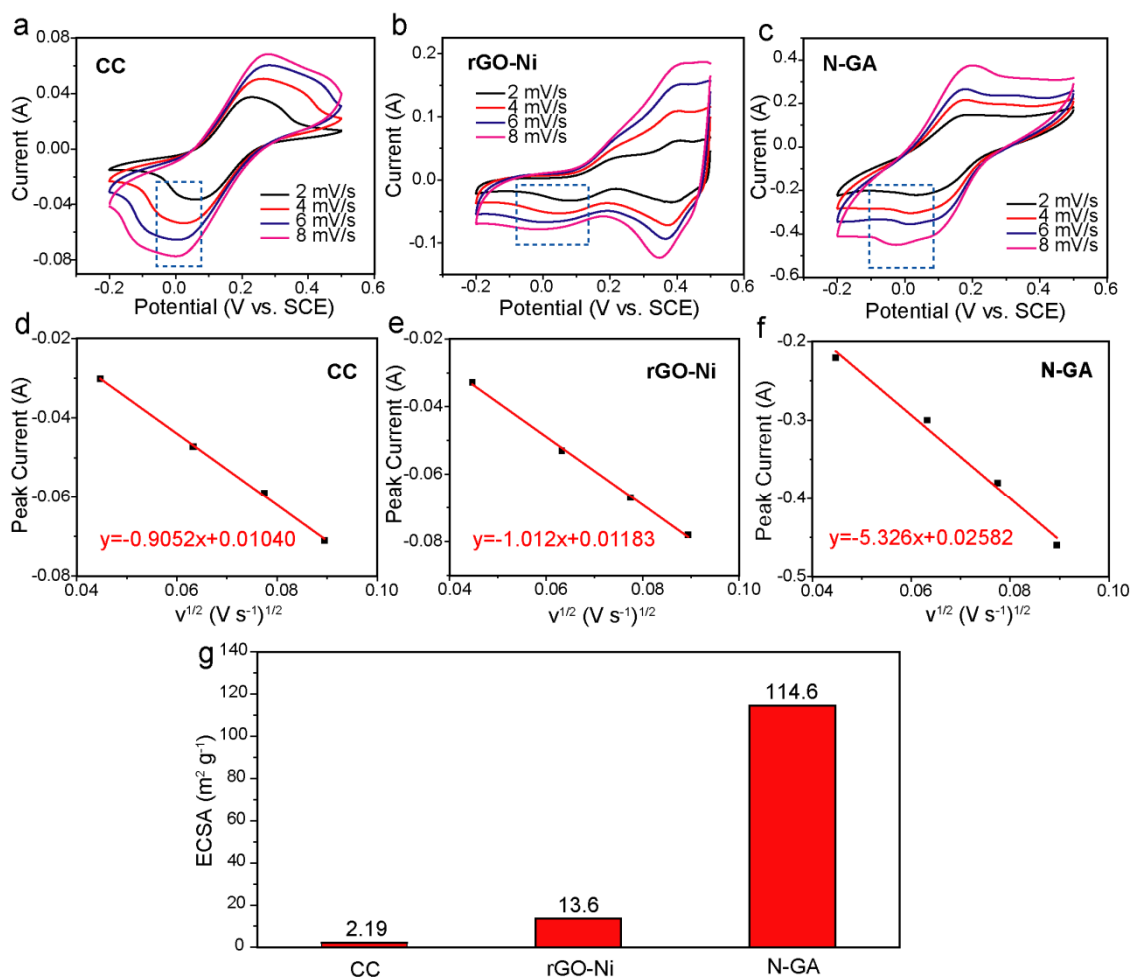

**Figure S3.** (a-c) CV diagrams collected at various small scan rates (2-8  $\text{mV s}^{-1}$ ) in 5 mM  $\text{K}_3\text{Fe}(\text{CN})_6$  containing 0.1 M  $\text{LiClO}_4$  as supporting electrolyte. The dashed boxes highlight the cathodic peaks that are chosen to calculate ECSAs. (d-f)  $i_p$  vs.  $v^{1/2}$  plots of the three bio-anodes. (g) Histogram compares the ECSA of the three bio-anodes.

To estimate the electrochemically accessible surface area (ECSA) of the bio-anodes, we have carried out the cyclic voltammetry (CV) in 5 mM potassium ferricyanide aqueous solution containing 0.1 M LiClO<sub>4</sub> as the supporting electrolyte. The ECSAs were evaluated using the following equation:<sup>[2]</sup>

$$i_p = (2.69 \times 10^5) n^{3/2} A D_0^{1/2} C_o^* v^{1/2} \quad [\text{Equation S1}]$$

where  $i_p$  (in A) stands for the peak current,  $n$  the number of electrons transferred in the following balanced equation (Equation S2, which we assumed 1 for this case),  $A$  (in cm<sup>2</sup>) the ECSA (not normalized to total mass),  $D_0$  the diffusion coefficient of Fe(CN)<sub>6</sub><sup>3-</sup> ( $0.7 \times 10^{-5}$  cm<sup>2</sup> s<sup>-1</sup> in aqueous solution<sup>[3]</sup>),  $C_o^*$  the bulk concentration of Fe(CN)<sub>6</sub><sup>3-</sup> ( $5 \times 10^{-6}$  mol mL<sup>-1</sup>), and  $v$  (in V s<sup>-1</sup>) the scan rate. The ECSA can be evaluated from the slope of  $i_p$  vs.  $v^{1/2}$  plot.

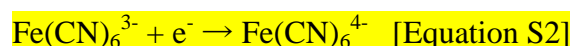

To obtain the slope, CV curves of the three bio-anodes were collected at small scan rates (2-8 mV s<sup>-1</sup>) (Figure S3a-c). The intensities ( $i_p$ ) of the cathodic peaks obtained at *ca.* 0.02 V (vs. SCE) at various scan rates were measured (the anodic peaks at *ca.* 0.2 V vs. SCE should also work but since for the rGO case, the anodic peak merges into the redox peaks of rGO, we chose the cathodic ones to calculate.). We plot  $i_p$  vs.  $v^{1/2}$  and fit the data points with a straight line, the slopes can be read from the corresponding algebraic equations (Figure S3d-f). The ECSAs then are evaluated using the Equation R3. Figure R2g summarizes the calculated ECSA for the three bio-anodes. Despite all ECSAs are smaller than the values obtained from BET measurement (due to the presence of intrinsic resistance, non-flat surface, non-accessible micro-pores and variation of  $C_o^*$  *etc.*), the N-GA still possesses the highest ECSA among the three electrodes, consistent with the trend revealed by BET and the highest power density achieved by the N-GA MFC.

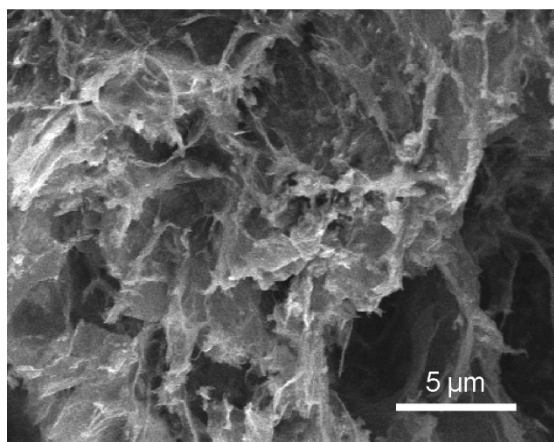

**Figure S4.** SEM images of the interior surface of bare N-GA.

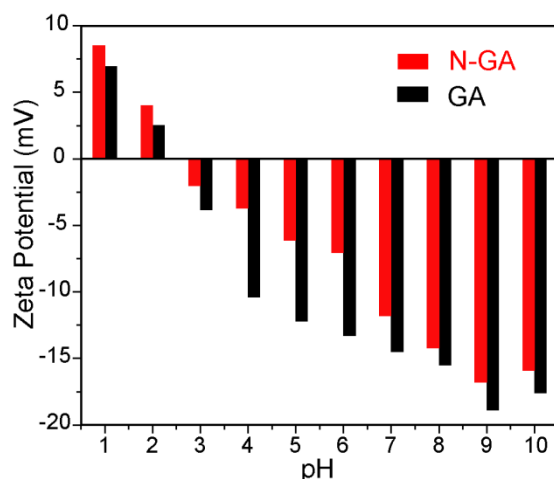

**Figure S5.** Zeta potentials of GA and N-GA aqueous dispersion collected at various pH values in water. 1 M HCl and 1 M NaOH aqueous solution were used to adjust pH value.

To show the amine groups imbibe positive charge, we measured the zeta-potentials of N-GA at various pH values and compared them with GA (Figure S5). Zeta-potential is a measurement on surface potential that largely depends on the surface charge.<sup>[4]</sup> The up-shifted zeta-potential of N-GA at pH=7 clearly revealed that surface of N-GA is more positive than that of GA, owing to the presence of positively charged amine groups, which is consistent with previous reports.<sup>[4-5]</sup>

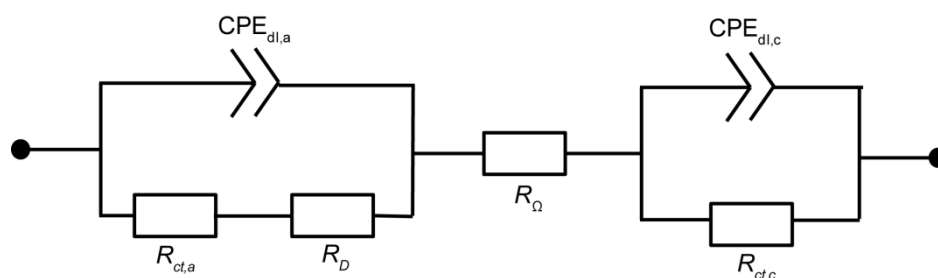

**Figure S6.** The equivalent circuit used for fitting EIS data. Abbreviations:  $R_{\Omega}$ —ohmic resistance (including the resistance of membrane);  $CPE_{dl,a}$  and  $CPE_{dl,c}$ —constant phase element associated to the double layer at the surface of anode and cathode, respectively;  $R_{ct,a}$  and  $R_{ct,c}$ —charge transfer resistance of anode and cathode, respectively.

**Table S2.** Fitted parameters of some elements in the equivalent circuit

| Anode  | $R_{\Omega}$ /ohm | $R_{ct,a}$ /ohm | $R_D$ /ohm |
|--------|-------------------|-----------------|------------|
| CC     | 53.08             | 294.7           | 237.1      |
| rGO-Ni | 35.01             | 36.78           | 99.52      |
| N-GA   | 54.01             | 9.32            | 81.14      |

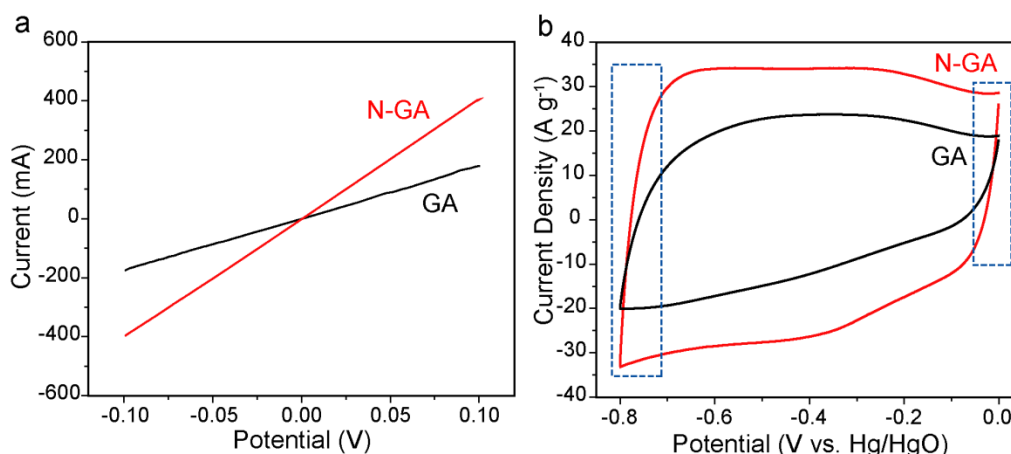

**Figure S7.** (a)  $I$ - $V$  curve collected for GA and N-GA in the absence of electrolyte using a two-electrode system with an electrochemical workstation. The distance between two probes is fixed to be 1.0 cm. (b) CV diagrams of GA and N-GA collected in 3 M KOH aqueous electrolyte at a scan rate of 100 mV/s. The blue dashed boxes highlight the region near the boundaries of the potential window where the two CV diagrams show different slopes.

Figure S7a shows the current ( $I$ ) vs. potential ( $V$ ) curves collected for N-GA and GA. The slope of the line is directly proportional to electrical conductivity. Obviously, N-GA exhibits a considerably higher slope than GA, indicating N-GA is more electrically conductive than GA. Figure S7b shows the cyclic voltammograms collected in a 3 M KOH aqueous electrolyte. It has been reported that the slope of cyclic voltammograms near two ends (highlighted by the two dashed boxes) is directly related to the electrical conductivity.<sup>[6]</sup> N-GA has a steeper slope than GA, suggesting a higher electrical conductivity.

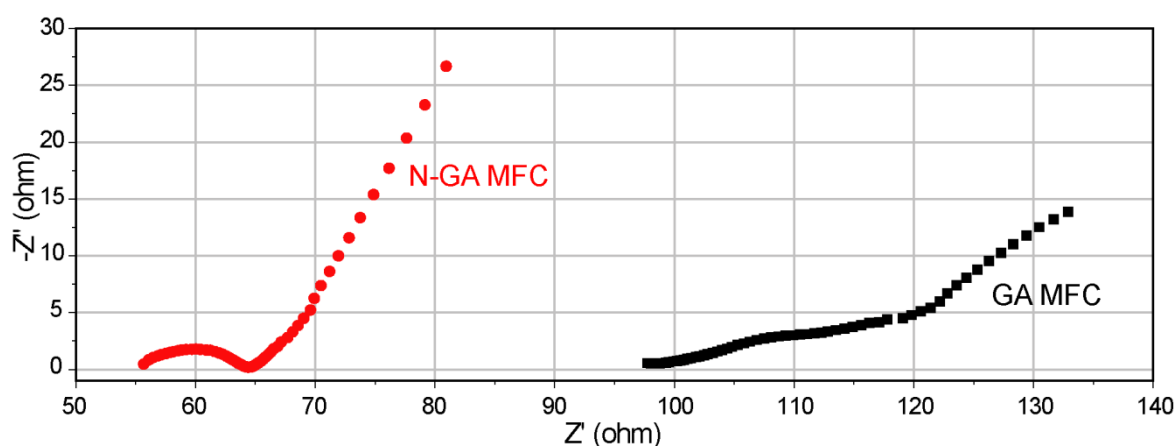

**Figure S8.** Nyquist plots collected for GA MFC and N-GA MFC in a frequency range from 0.01 Hz to 10000 Hz at the open circuit potential with a perturbation of 5 mV. The ohmic resistance is estimated from the  $Z'$ -intercept of the spectrum.

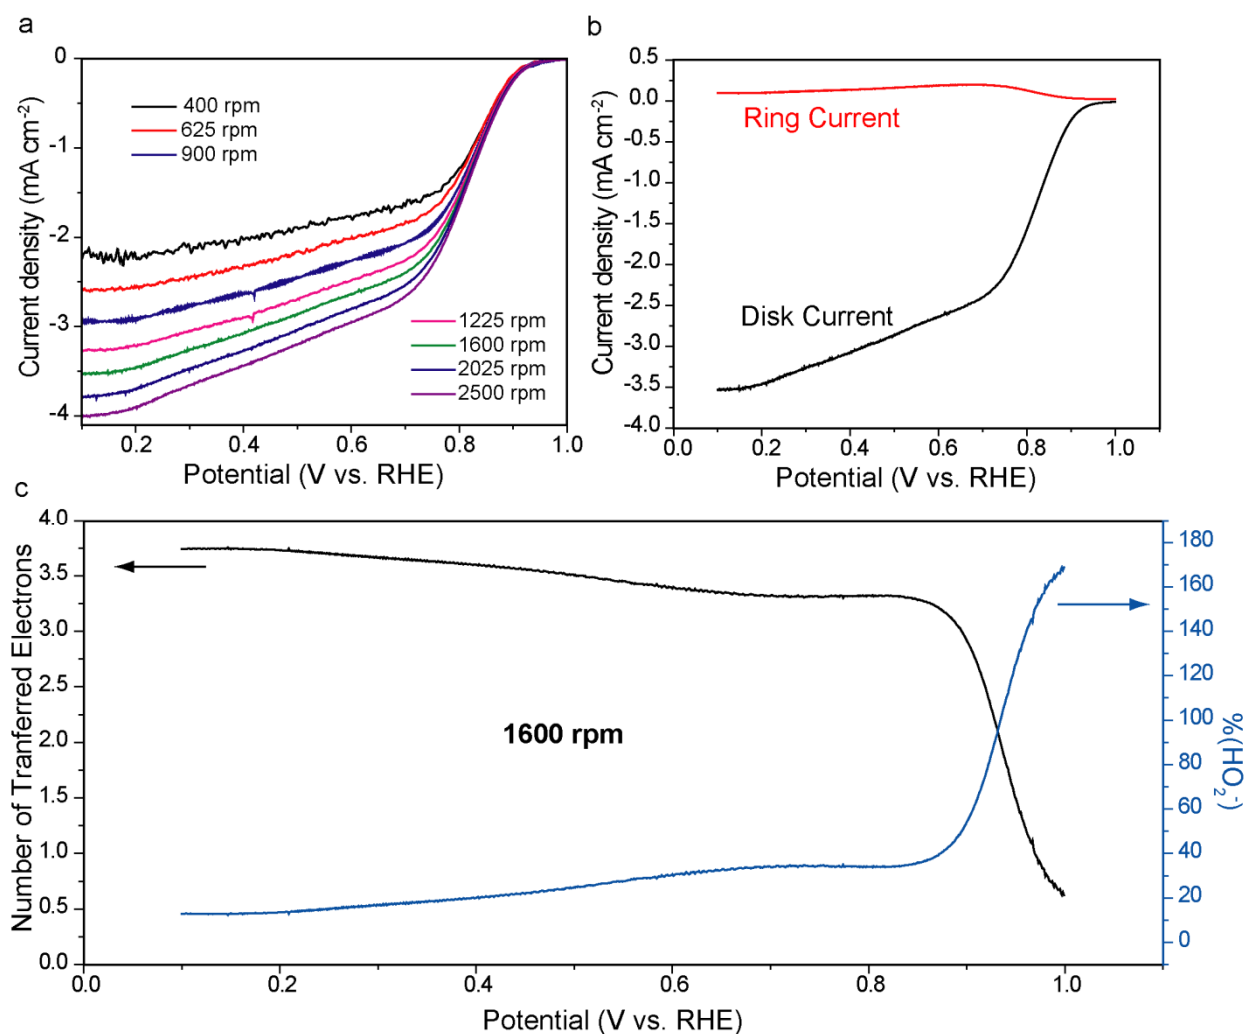

**Figure S9.** (a) RRDE curves of N-GA collected in O<sub>2</sub>-saturated 0.1 M aqueous KOH solution at various rotation speeds. (b) Disk and ring current vs. potential curves collected at 1600 rpm in O<sub>2</sub>-saturated 0.1 M aqueous KOH solution. (c) Number of transferred electrons (black curve) and yield of peroxide anion (blue curve) derived from the disc and ring current as a function of potential at 1600 rpm.

The rotating ring disk electrode (RRDE) measurement was performed to evaluate N-GA's oxygen reduction reaction (ORR) activity as a MFC cathode. Figure S9a shows the RRDE voltammograms collected at various scan rates. Cathodic currents at all scan rates started to emerge at approximately +0.88 V (vs. reversible hydrogen electrode, RHE). This on-set potential is only slightly lower than that of 10 wt% Pt/C (+0.94 vs. RHE).<sup>[7]</sup> The ring current is about 10 times lower than the disk current (Figure S9b), indicating peroxide species are rarely generated in the process. The number of transferred electrons ( $n$ ) can be estimated based on the following equation:<sup>[8]</sup>

$$n = \frac{4I_D}{(I_D + \frac{I_R}{N})}$$

where  $I_R$  is the ring current,  $I_D$  the disk current and  $N$  the collection efficiency (37%).<sup>[9]</sup> At the high

rotating speed (1600 rpm),  $n$  increases drastically from 0 to 3.45 in the potential range from 1.0 to 0.82 V (Figure S9c). The maximum total number of transferred electrons is 3.75, suggesting a four-electron pathway dominates the reduction process. The yield of peroxide anion [%( $\text{HO}_2^-$ )] can be determined by the following equation:<sup>[10]</sup>

$$\%(\text{HO}_2^-) = 200 \times \frac{I_R/N}{(I_D+I_R/N)}$$

A low peroxide yield (13.3%) is obtained in the potential range of 0.1 V~0.2 V. It again verifies a four-electron pathway that leads to the formation of hydroxide ions is the major process. The catalytic performance of N-GA for ORR is comparable to some other carbon-based catalysts including carbon-supported Fe-N electrocatalyst,<sup>[11]</sup> and graphitized multi-walled carbon nanotubes.<sup>[12]</sup>

## References

- [1] (a) Y. Zhang, Z. Sun, H. Wang, Y. Wang, M. Liang, S. Xue, *RSC Adv.* **2015**, 5, 10430; (b) F. Zheng, Y. Yang, Q. Chen, *Nat. Commun.* **2014**, 5, 5261.
- [2] G. y. Jarzabek, Z. Borkowska, *Electrochim. Acta.* **1997**, 42, 2915.
- [3] S. Konopka, B. McDuffie, *Anal. Chem.* **1970**, 42, 1741.
- [4] S. A. Hasan, E. K. Tsekoura, V. Sternhagen, M. Strømme, *J. Phys. Chem. C* **2012**, 116, 6530.
- [5] S. Cheng, B. E. Logan, *Electrochem. Commu.* **2007**, 9, 492.
- [6] Z. Bo, W. Zhu, W. Ma, Z. Wen, X. Shuai, J. Chen, J. Yan, Z. Wang, K. Cen, X. Feng, *Adv.Mater.* **2013**, 25, 5799.
- [7] J. Lu, W. Zhou, L. Wang, J. Jia, Y. Ke, L. Yang, K. Zhou, X. Liu, Z. Tang, L. Li, *ACS Catal.* **2016**, 6, 1045.
- [8] M. Lefèvre, J.-P. Dodelet, *Electrochim. Acta.* **2003**, 48, 2749.
- [9] K. Liu, Y. Song, S. Chen, *Nanoscale* **2015**, 7, 1224.
- [10] G. Wu, K. L. More, C. M. Johnston, P. Zelenay, *Science* **2011**, 332, 443.
- [11] C. W. Bezerra, L. Zhang, K. Lee, H. Liu, J. Zhang, Z. Shi, A. L. Marques, E. P. Marques, S. Wu, J. Zhang, *Electrochim. Acta.* **2008**, 53, 7703.
- [12] M. J. Larsen, E. M. Skou, *J. Power Sources* **2012**, 202, 35.
